# Supplementary material for: Synthesis of Novel FTY720 Analogs with Anticancer Activity through PP2A Activation
Source: Molecules. 2018 Oct 24;23(11):2750. doi: 10.3390/molecules23112750 (PMC6278267; doi:10.3390/molecules23112750)

## Supplementary data

# Synthesis of Novel FTY720 Analogs with Anticancer Activity through PP2A Activation

Jitendra Shrestha <sup>1†</sup>, Sung Hwan Ki <sup>2†</sup>, Sang Mi Shin <sup>2</sup>, Seon Woong Kim <sup>1</sup>, Joo-Youn Lee <sup>3,4</sup>, Hee-Sook Jun <sup>5</sup>, Taeho Lee <sup>6</sup>, Sanghee Kim <sup>3</sup>, Dong Jae Baek <sup>1,\*</sup>, Eun-Young Park <sup>1,\*</sup>

- <sup>1</sup> College of Pharmacy and Natural Medicine Research Institute, Mokpo National University, Jeonnam 58554, South Korea; shresthasimon2011@mokpo.ac.kr (J.S.); tjsdnd123@mokpo.ac.kr (S.W.K.)
- <sup>2</sup> College of Pharmacy, Chosun University, Gwangju, 61452, South Korea; shki@chosun.ac.kr (S.H.K.); smshin@chosun.ac.kr (S.M.S.)
- <sup>3</sup> College of Pharmacy, Seoul National University, Seoul 08826, South Korea; leeji@krikt.re.kr (J.-Y.L.); pennkim@snu.ac.kr (S.K.)
- <sup>4</sup> Korea Chemical Bank, Korea Research Institute of Chemical Technology, Daejeon 34114, South Korea; leeji@krikt.re.kr (J.-Y.L.)
- <sup>5</sup> Lee Gil Ya Cancer and Diabetes Institute, Department of Molecular Medicine, Gachon University, Incheon 21999, South Korea; College of Pharmacy and Gachon Institute of Pharmaceutical Science, Gachon University, Incheon 21936, South Korea; hsjun@gachon.ac.kr (H.-S.J.)
- <sup>6</sup> College of Pharmacy, Research Institute of Pharmaceutical Sciences, Kyungpook National University, Daegu 41566, South Korea; tlee@knu.ac.kr (T.L.)

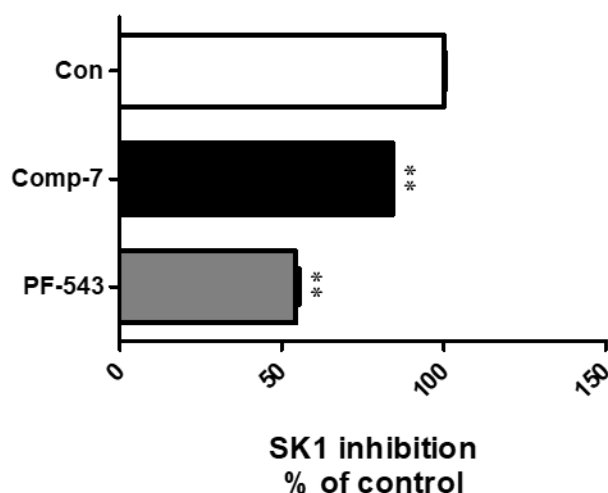

**Figure S1.** SK1 inhibition assay of compound 7. SK1 activity was measured with 40  $\mu$ M compound 7 (Comp-7) and PF-543 using Echelon's Sphingosine Kinase Activity Assay kit according to the manufacturer's protocol (100  $\mu$ M sphingosine, 10  $\mu$ M ATP and 0.5 ng/ $\mu$ L of recombinant sphingosine kinase 1).

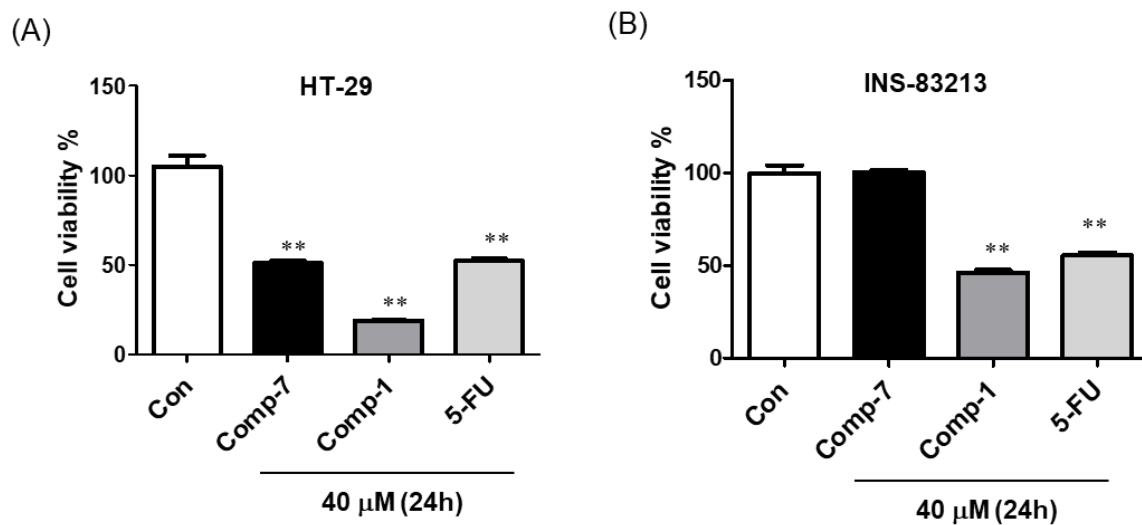

**Figure S2.** Cell cytotoxic effect of compound 7 in cancer and normal cell line. (A) HT-29 and (B) INS-83213 cells were plated in 96 well and treated with compound 7, compound 1 (FTY720) and 5-fluorouracil (5-FU) 40  $\mu$ M for 24 h, and cell viability was measured by EZ-CYTOTOX kit. Data are means  $\pm$  SD from three independent experiments. ( $n=8$ ) \*\* $p<0.01$  compared with control cells.

170615-DJ-73-1H  
DJ-73, 1H 170615, CDCl<sub>3</sub>

CCCCC(=O)Nc1ccc(CCO)cc1  
11

Chemical structure of compound 11: CCCCC(=O)Nc1ccc(CCO)cc1. The structure shows a benzamide core with a 4-(2-hydroxyethyl)phenyl group and a pentyl group on the amide nitrogen.

<sup>1</sup>H NMR spectrum (CDCl<sub>3</sub>) of compound 11. The x-axis represents the chemical shift in ppm, ranging from -0.5 to 9.5. The spectrum shows several peaks corresponding to the protons in the molecule.

Key peaks observed:

- Aromatic protons: Multiplet between 7.0 and 7.3 ppm.
- Amide NH: Singlet at approximately 9.0 ppm.
- Aliphatic protons: Multiple peaks in the aliphatic region, including a triplet at ~3.9 ppm, a triplet at ~3.6 ppm, and a multiplet at ~2.5 ppm.
- Alkyl protons: Multiplet at ~1.5 ppm and a triplet at ~0.8 ppm.

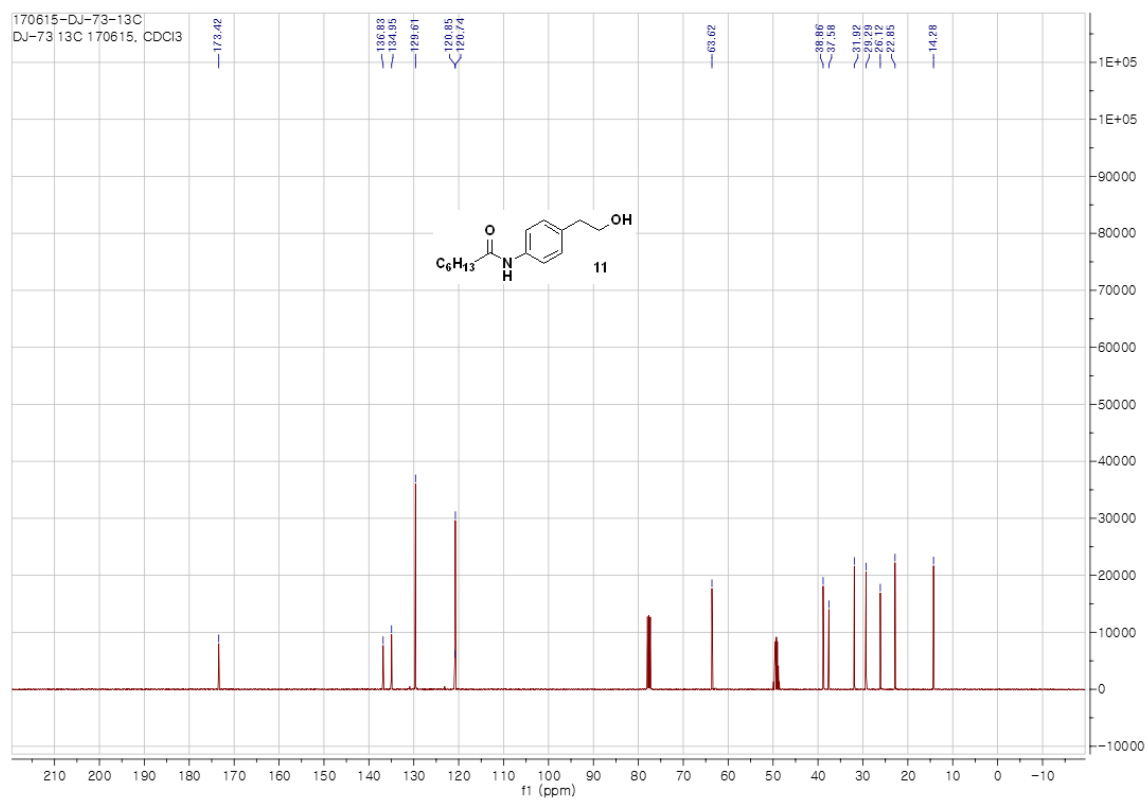

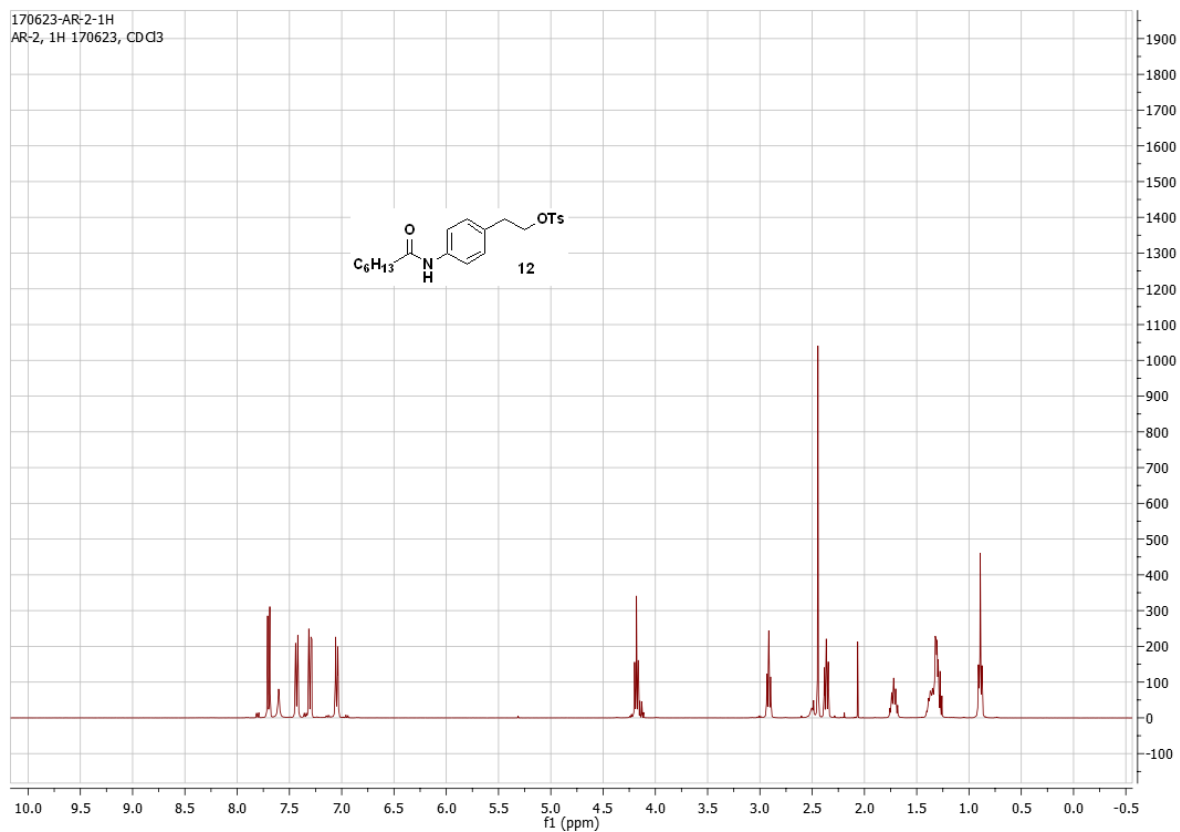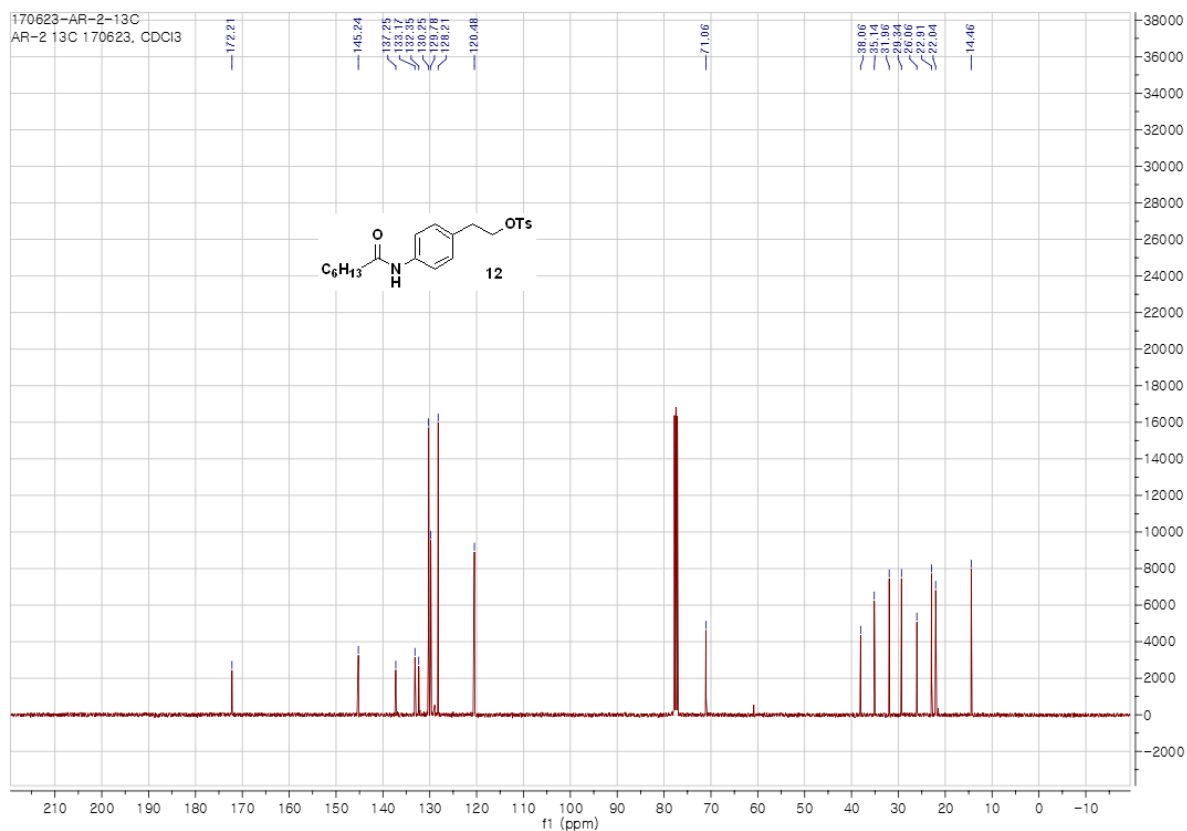

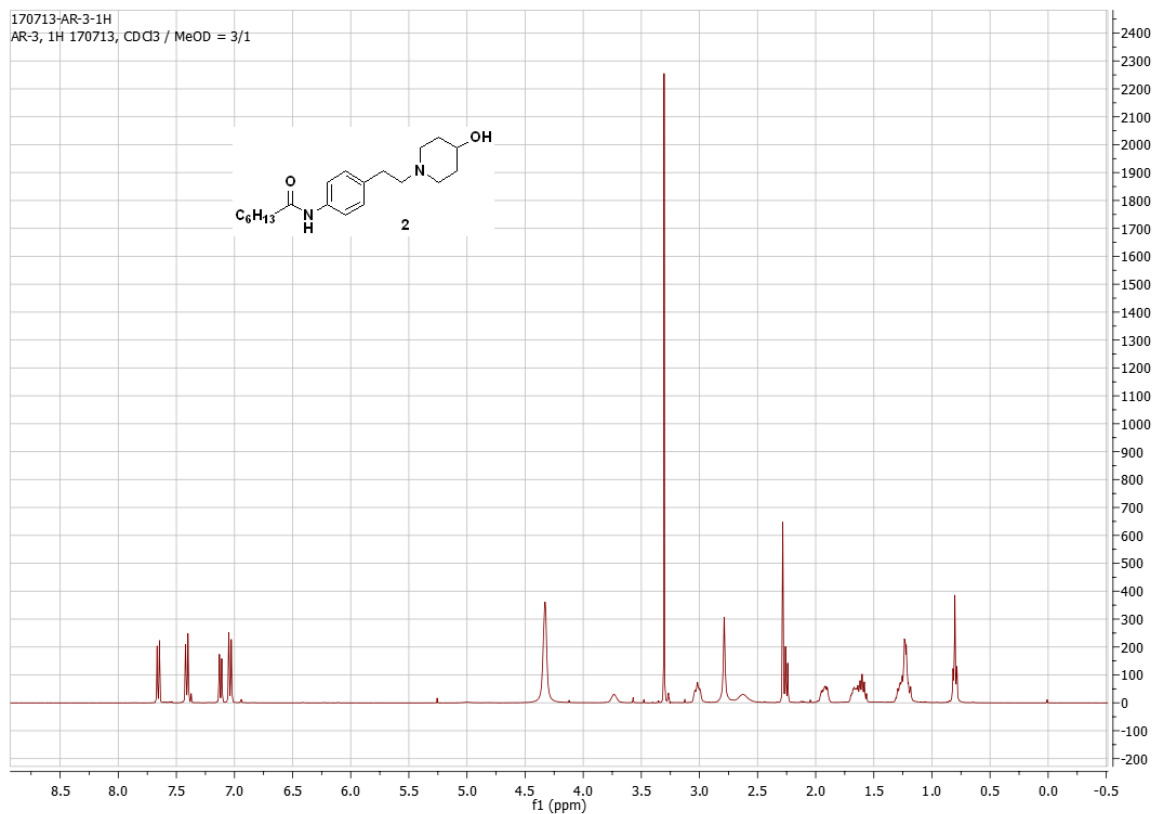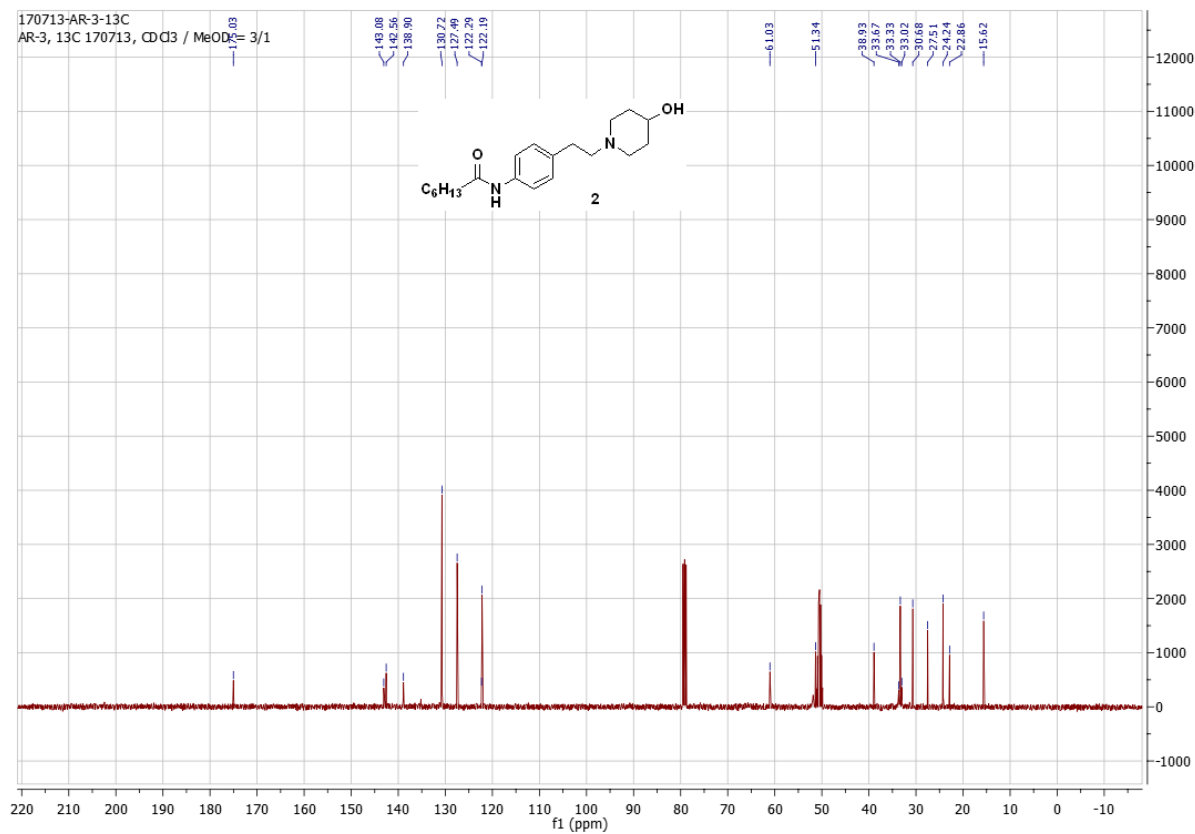

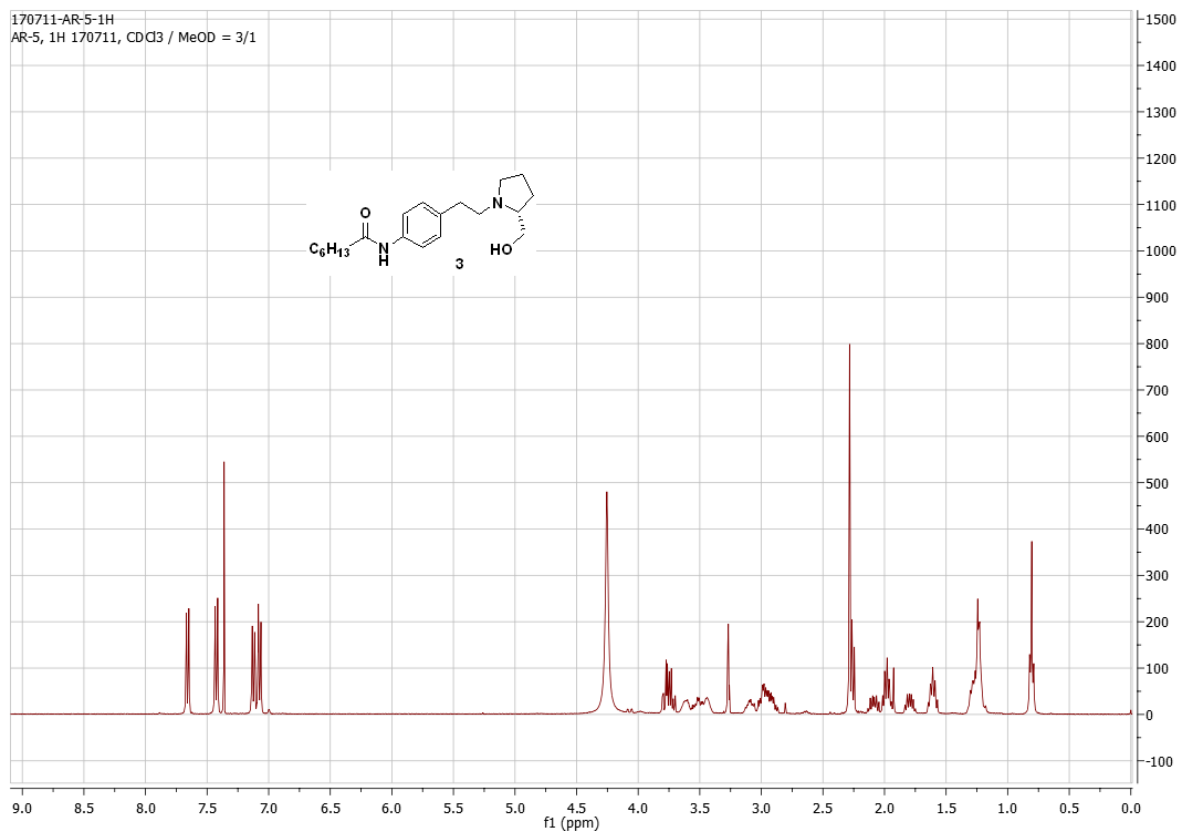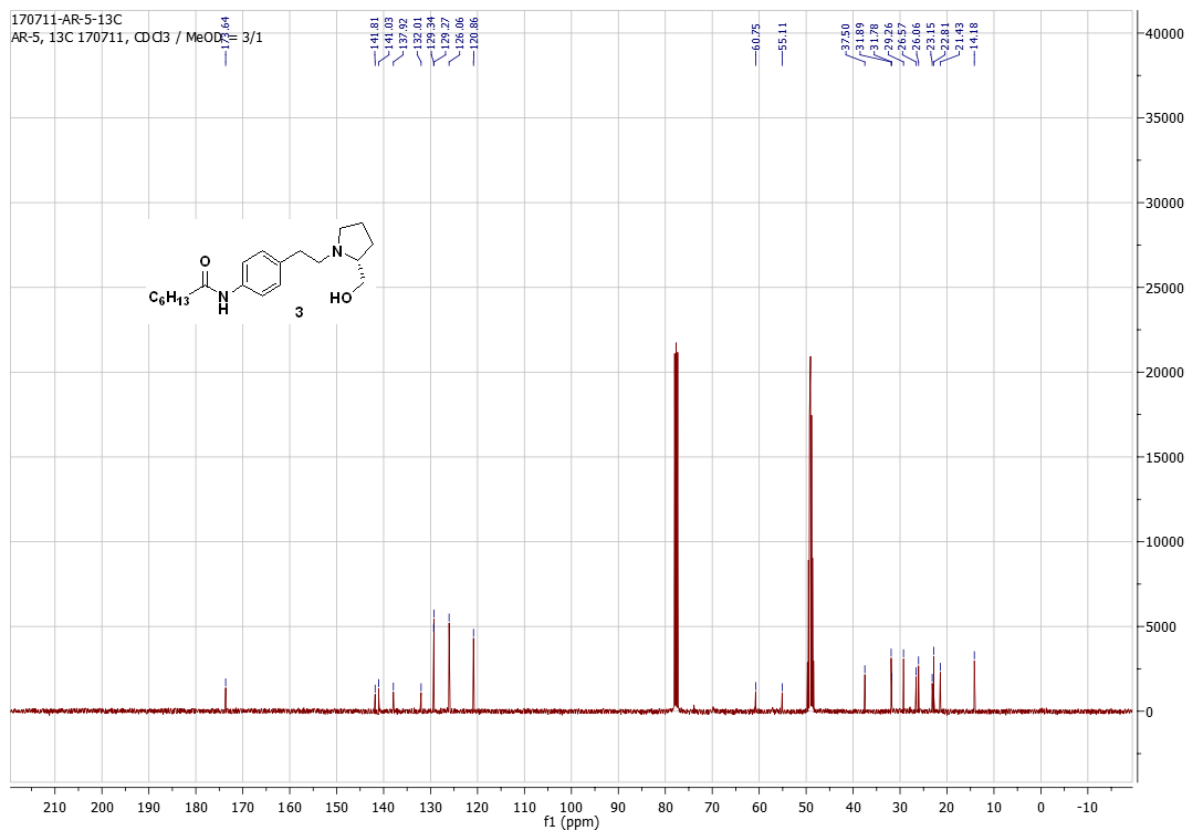

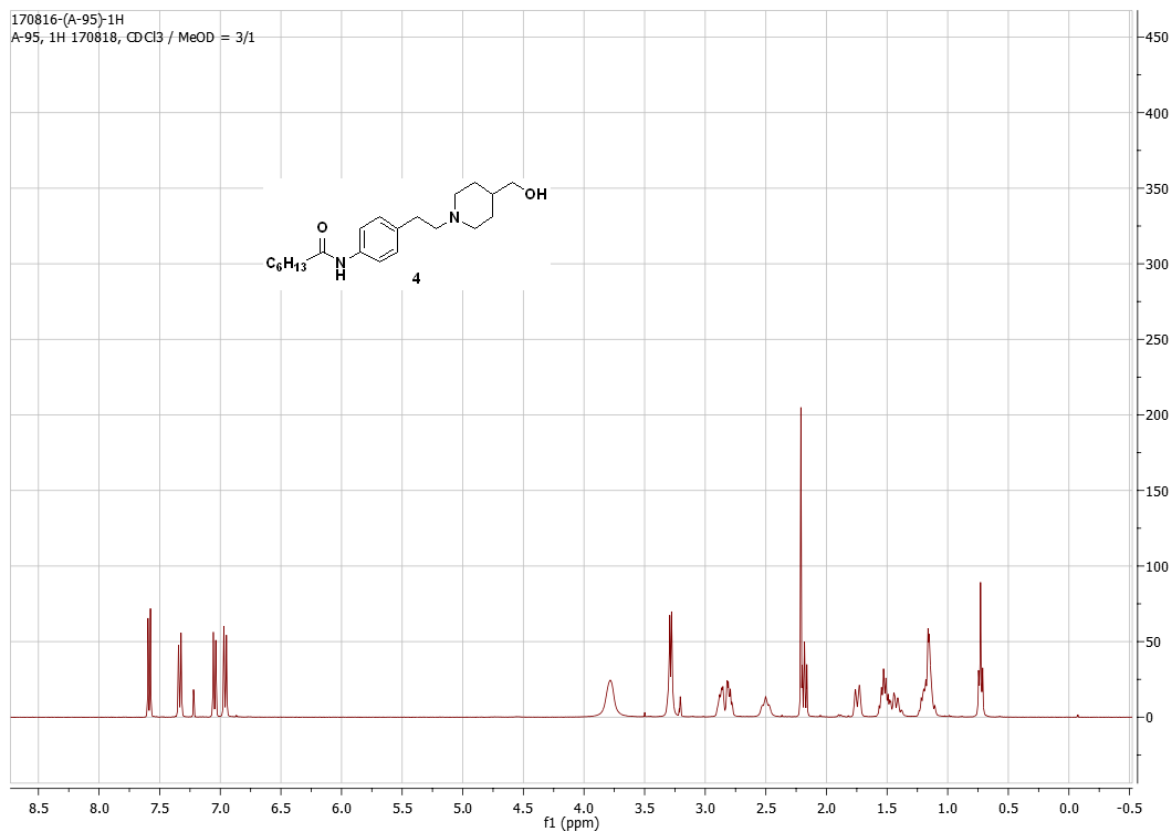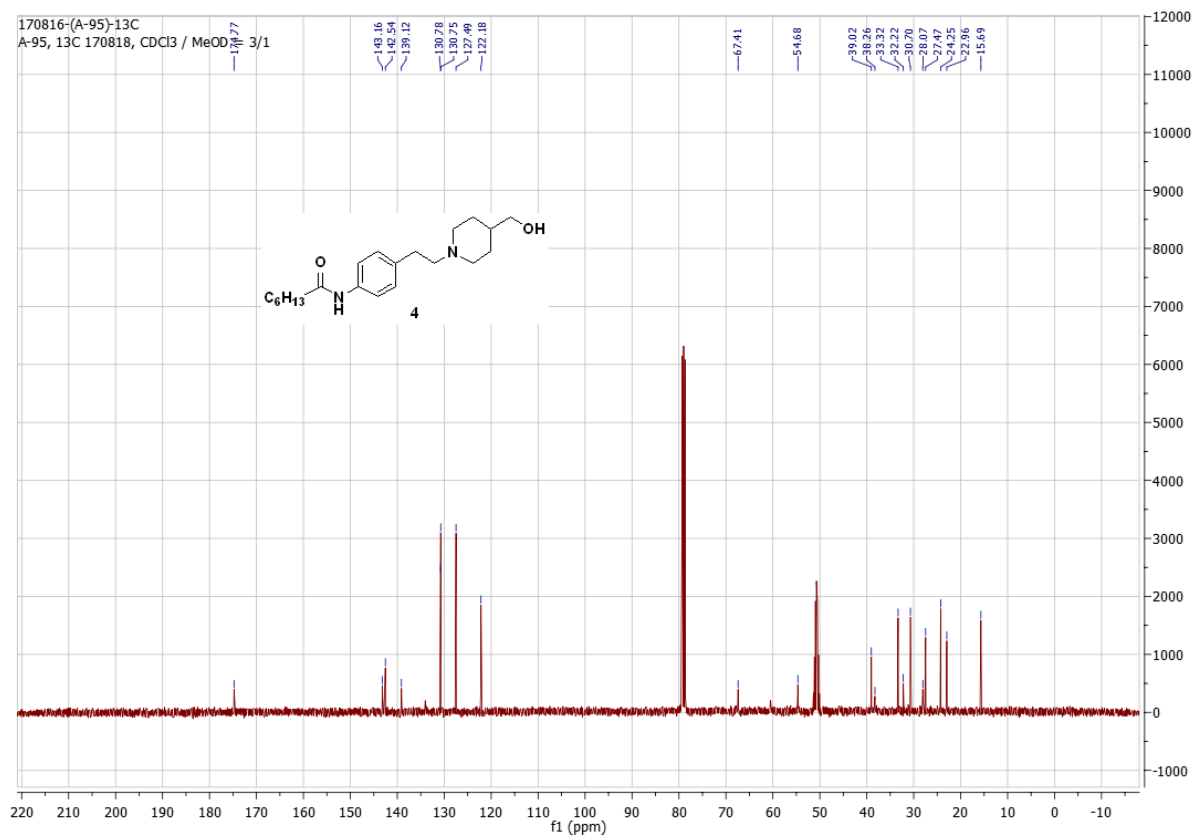

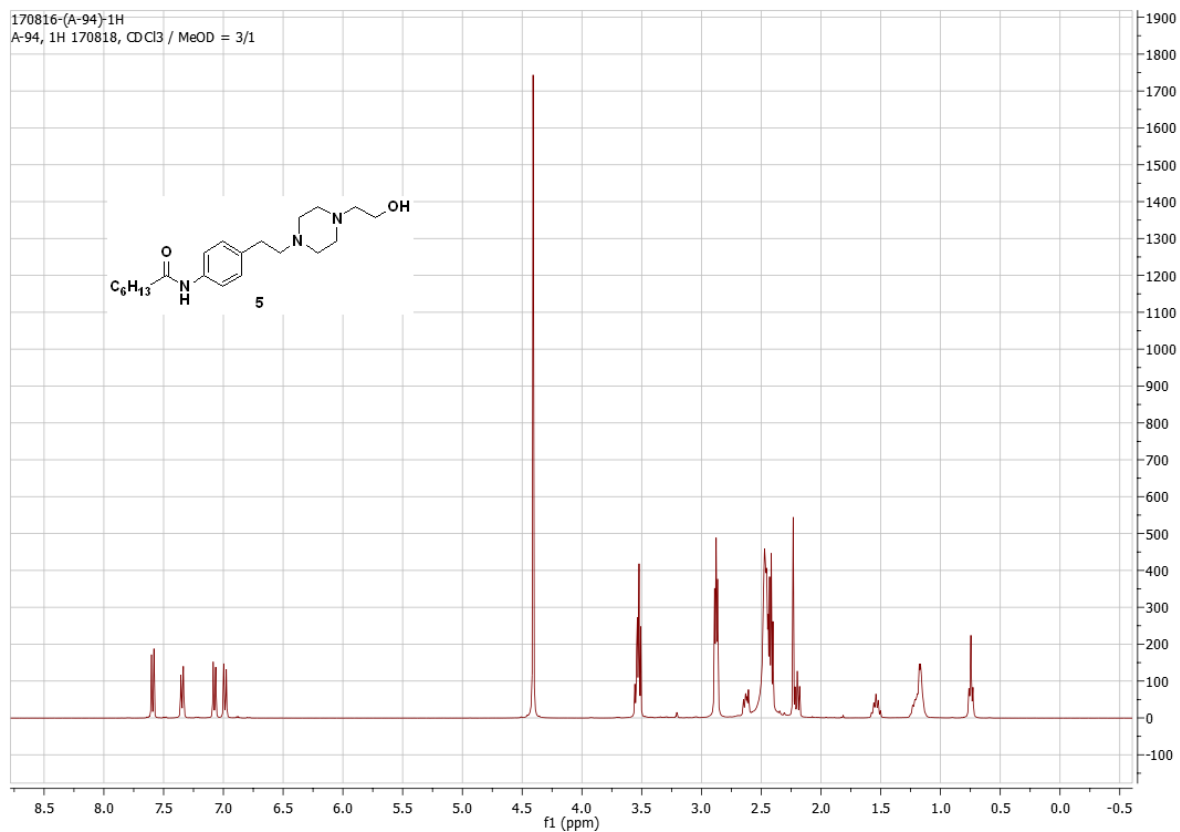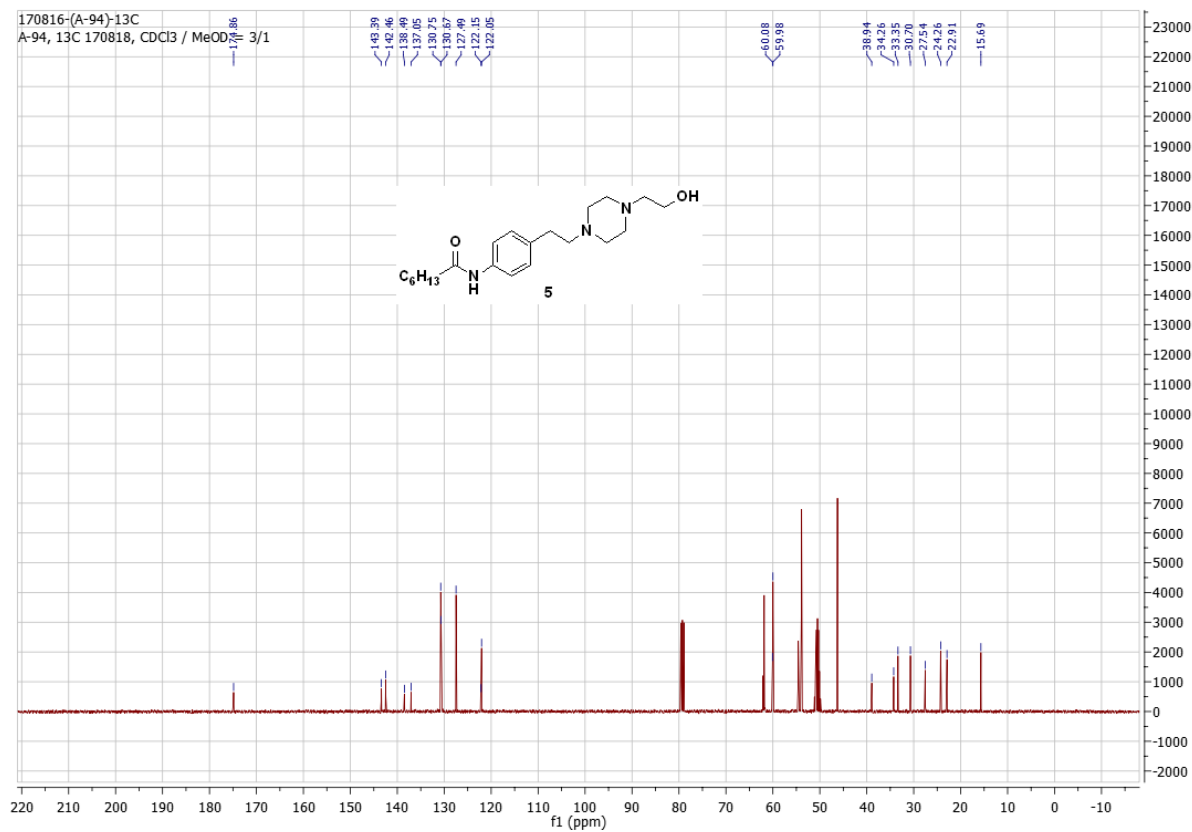

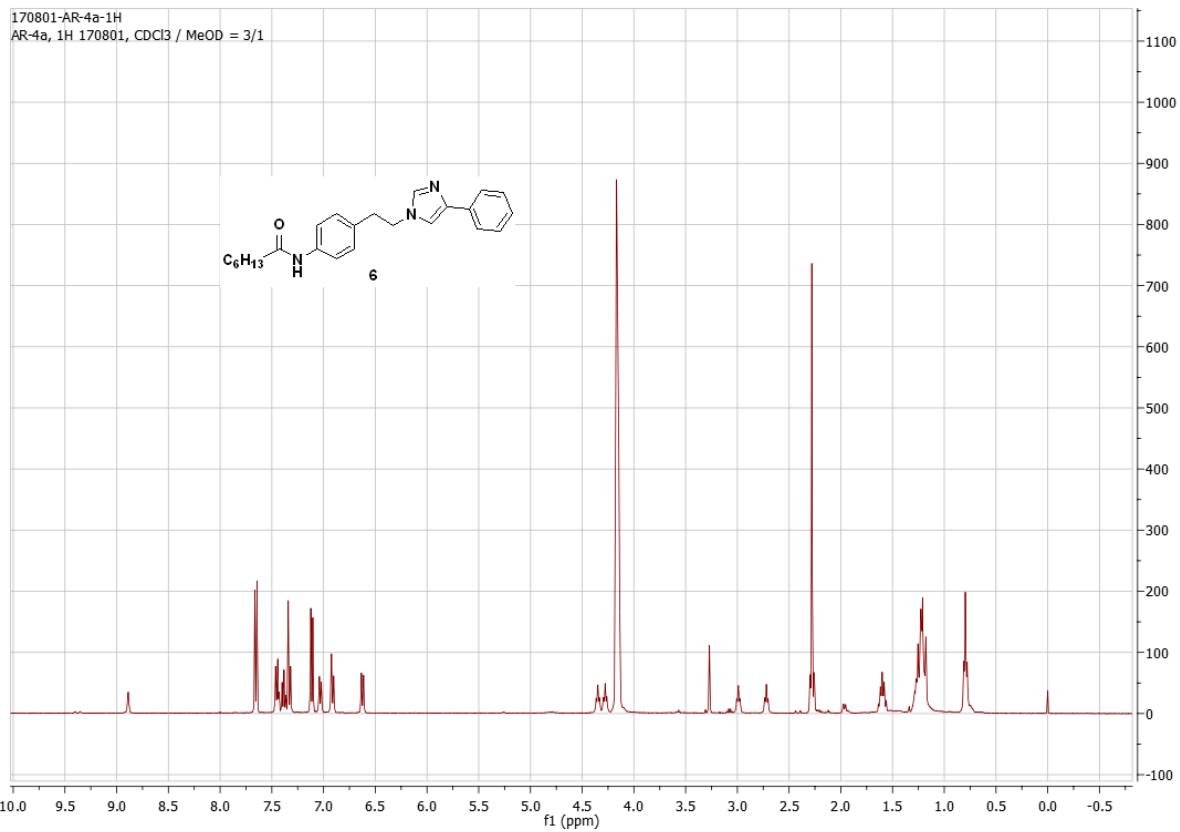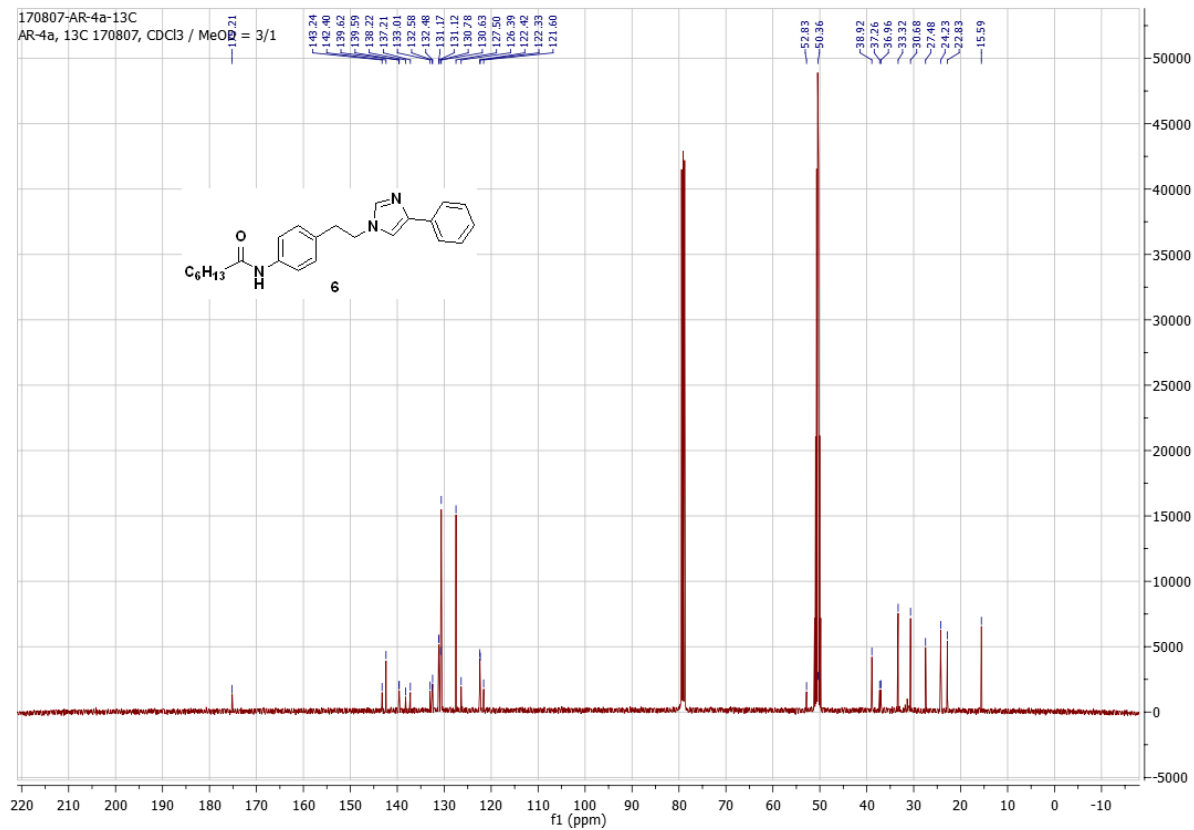

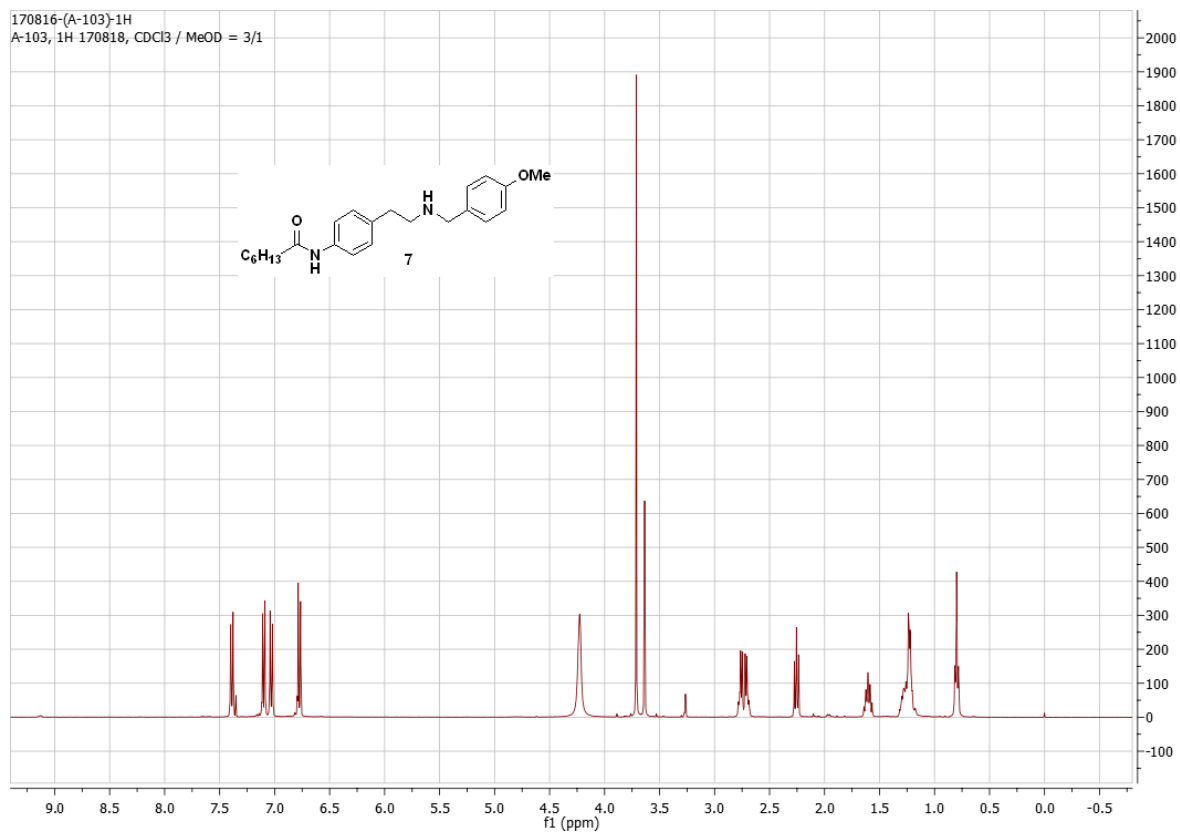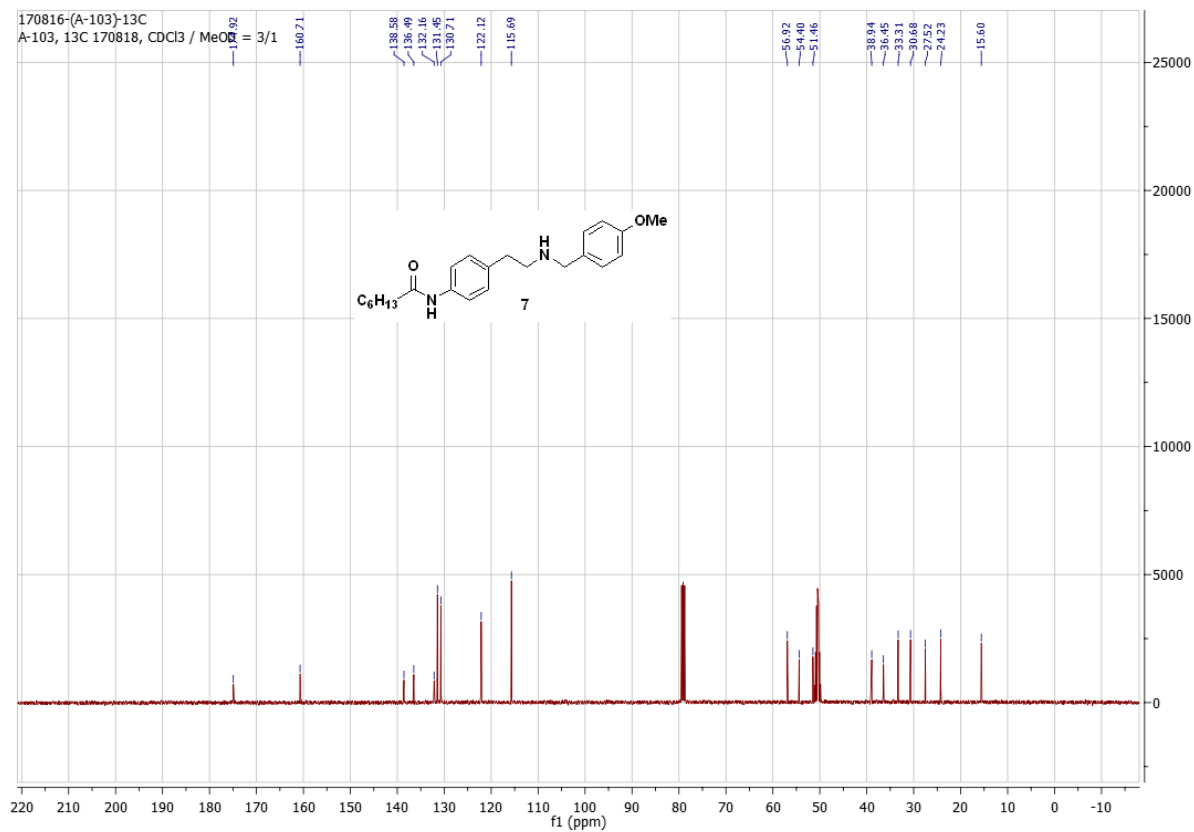

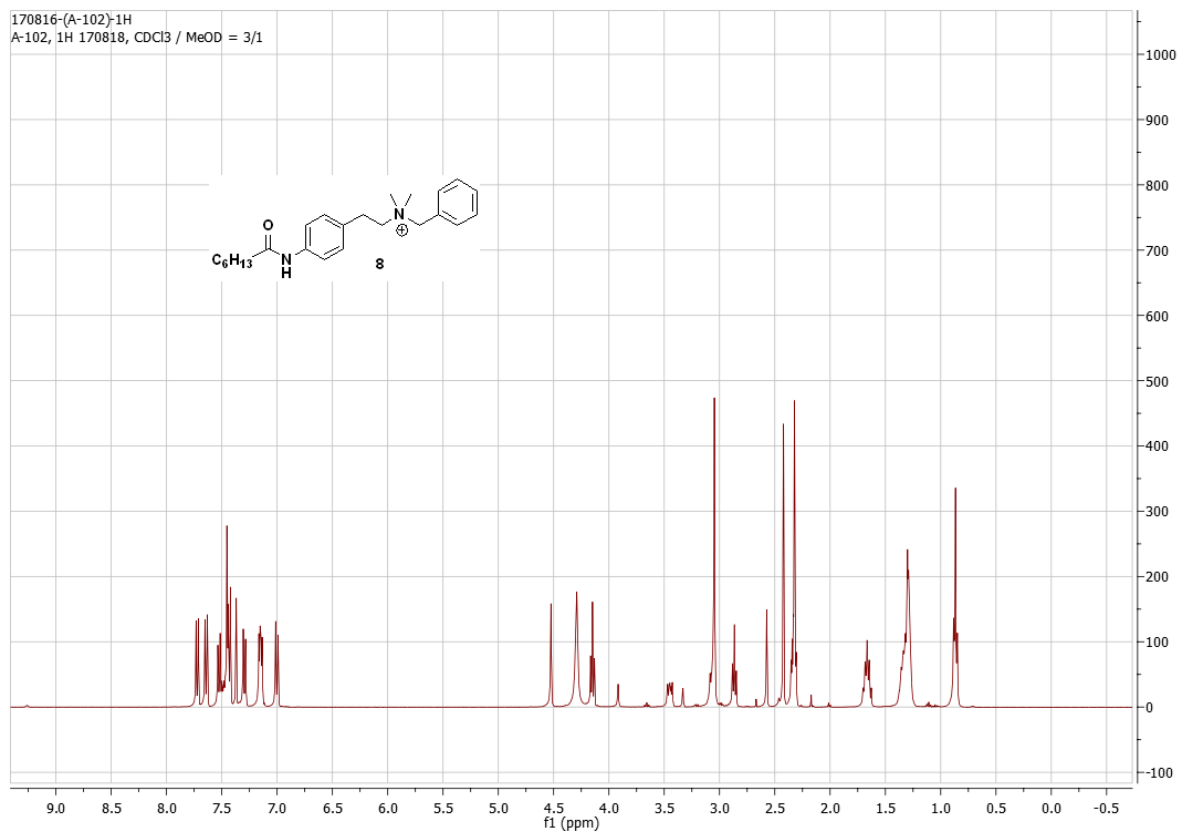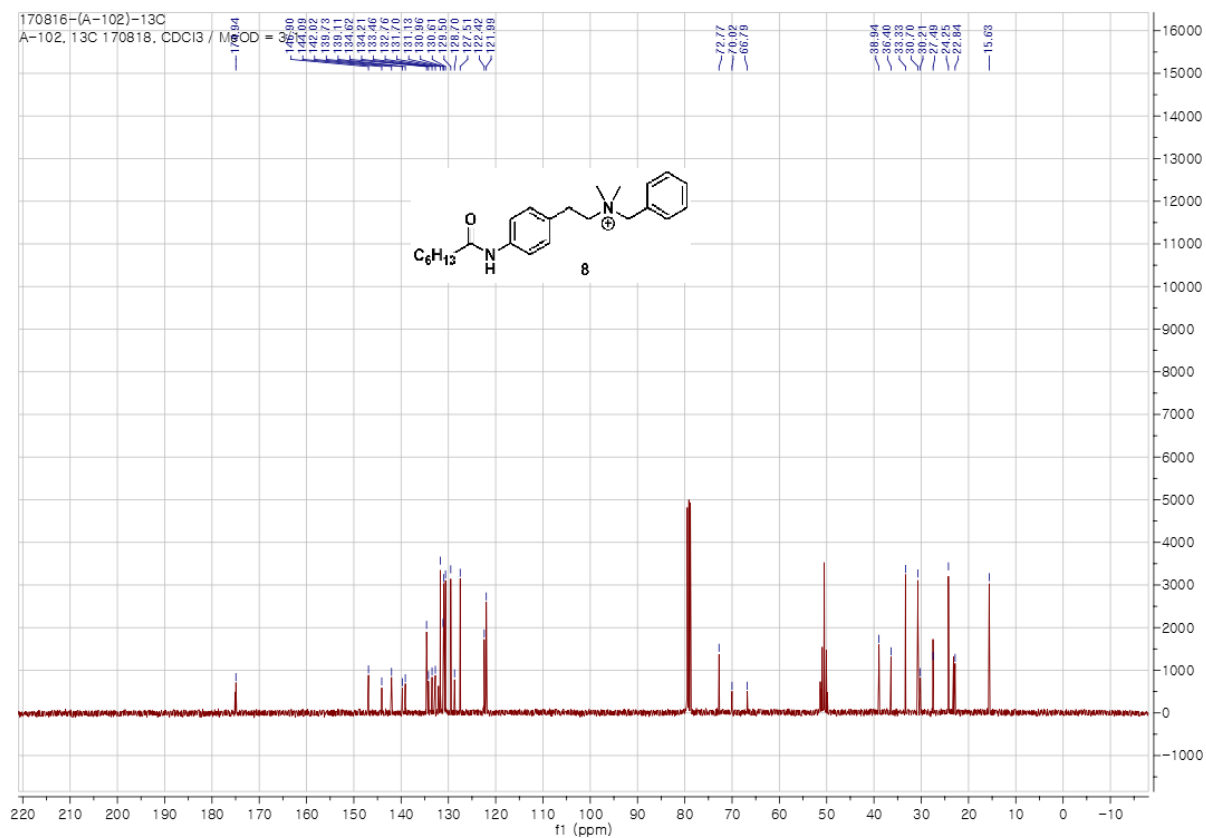

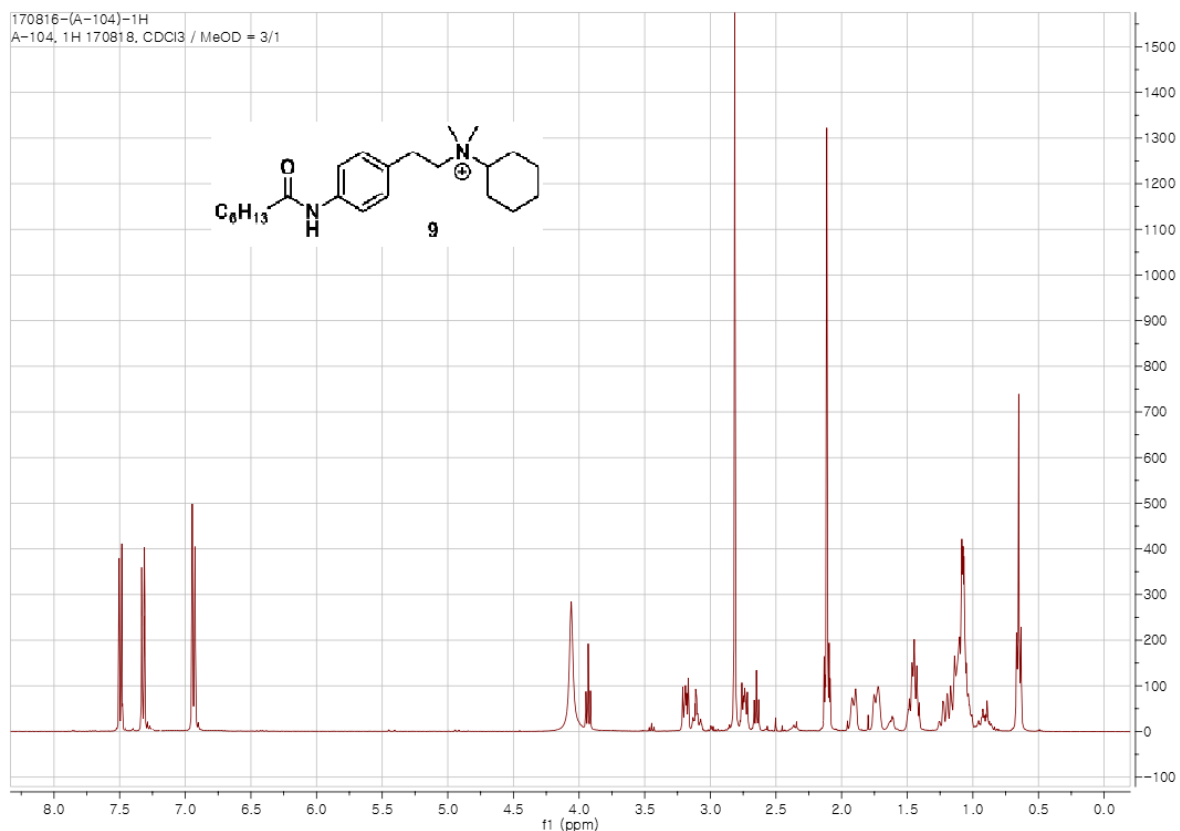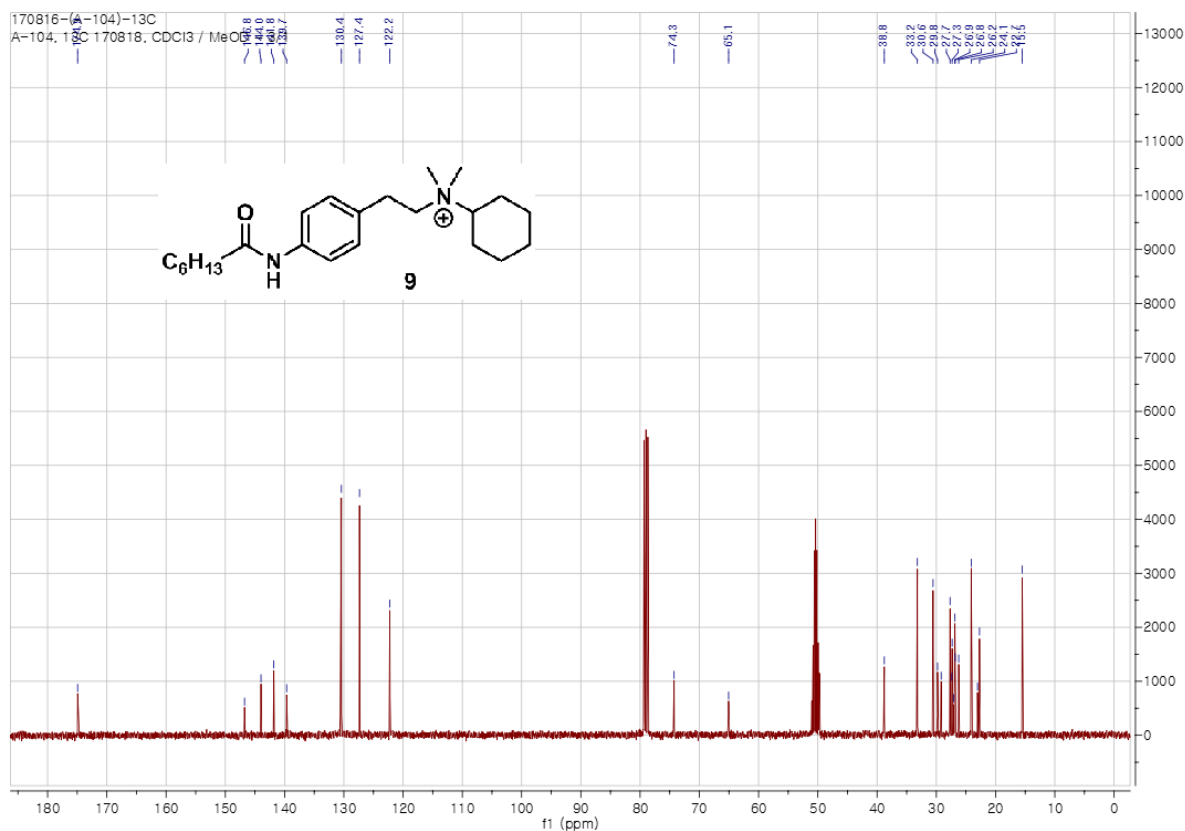

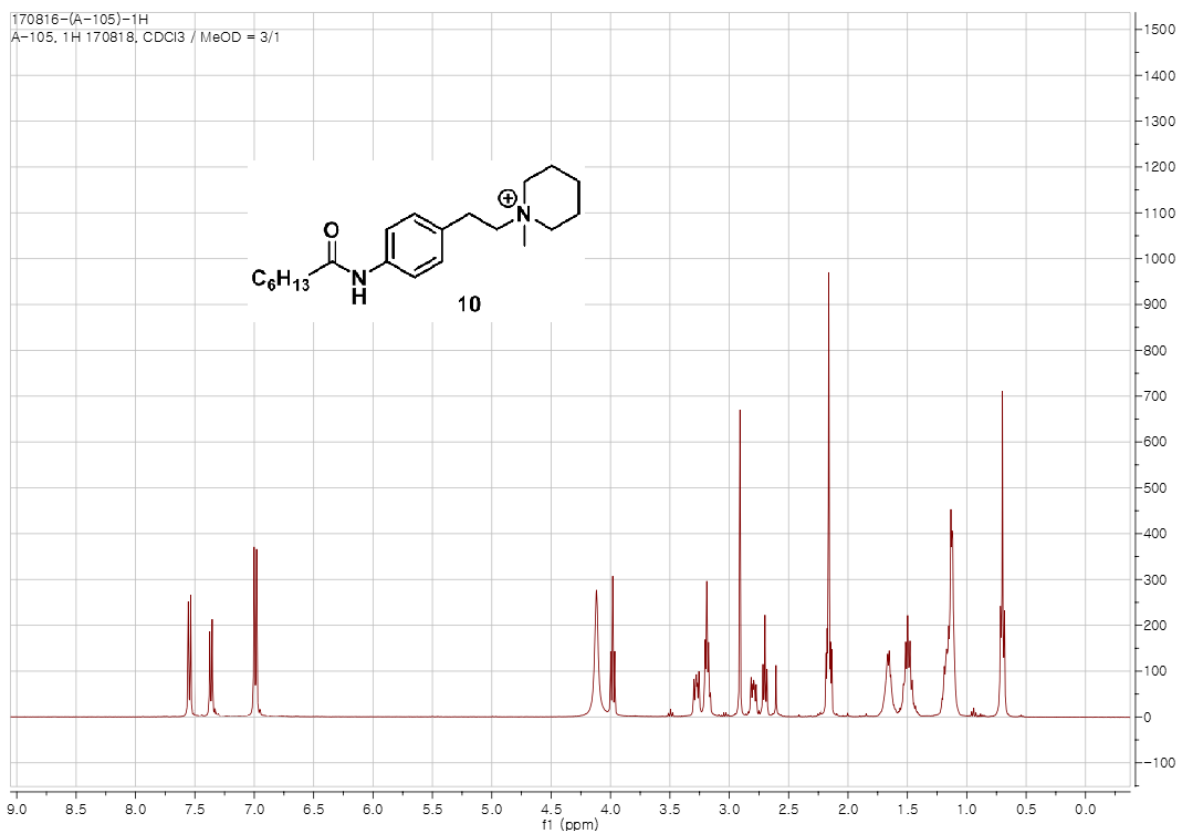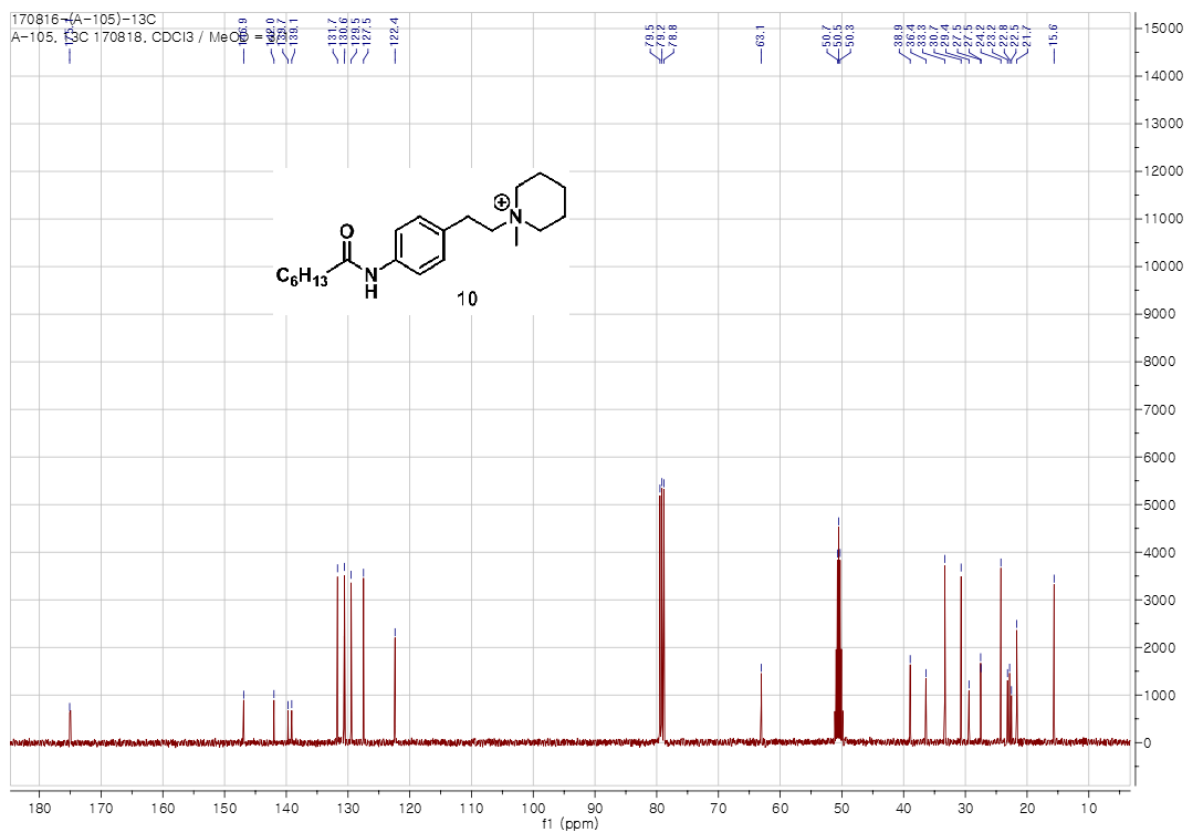

HRMS sample name: A-73 (compound 11), AR-2 (compound 12), AR-3 (compound 2), AR-5 (compound 3), A-95 (compound 4), A-94 (compound 5), AR-4 (compound 6), A-103 (compound 7), A-102 (compound 8), A-104 (compound 9), A-105 (compound 10)

|                               |                                                      |                      |                      |
|-------------------------------|------------------------------------------------------|----------------------|----------------------|
| <b>Data File</b>              | 20180410A                                            | <b>Sample Name</b>   | A-73                 |
| <b>Sample Type</b>            | Sample                                               | <b>Position</b>      |                      |
| <b>Instrument Name</b>        | Instrument 1                                         | <b>User Name</b>     |                      |
| <b>Acq Method</b>             | HC ESI Pos Small Molecule LT No HPLC.m               | <b>Acquired Time</b> | 4/10/2018 4:08:50 PM |
| <b>IRM Calibration Status</b> | Success                                              | <b>DA Method</b>     | HCEmpirical1.m       |
| <b>Comment</b>                | EM=249.3540 M=HC ESI Pos Small Molecule LT No HPLC.m |                      |                      |

**Sample Group** Info.  
**Molecular Formula** C15H23NO2

#### Compound Table

| Compound Label   | RT   | Mass     | Abund | Formula   |
|------------------|------|----------|-------|-----------|
| Cpd 1: C15H23NO2 | 0.25 | 250.1807 | 42513 | C15H23NO2 |

| Compound Label   | m/z      | RT   | Algorithm       | Mass     |
|------------------|----------|------|-----------------|----------|
| Cpd 1: C15H23NO2 | 250.1844 | 0.25 | Find By Formula | 250.1807 |

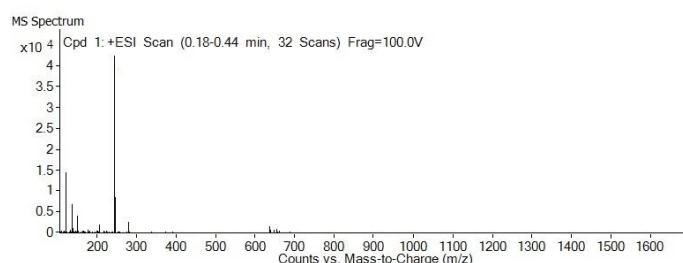

|                               |                                |                      |                      |
|-------------------------------|--------------------------------|----------------------|----------------------|
| <b>Data File</b>              | 20180418F                      | <b>Sample Name</b>   | AR-2                 |
| <b>Sample Type</b>            | Sample                         | <b>Position</b>      |                      |
| <b>Instrument Name</b>        | Instrument 1                   | <b>User Name</b>     |                      |
| <b>Acq Method</b>             | No HPLC MeOH 1.m               | <b>Acquired Time</b> | 4/18/2018 5:31:01 PM |
| <b>IRM Calibration Status</b> | Success                        | <b>DA Method</b>     | Data 1.m             |
| <b>Comment</b>                | EM=403.5370 M=No HPLC MeOH 1.m |                      |                      |

**Sample Group** Info.  
**Molecular Formula** C22H29NO4S  
**Acquisition SW Version** 6200 series TOF/6500 series Q-TOF B.05.01 (B5125.1)

#### Compound Table

| Compound Label    | RT    | Mass     | Abund  | Formula    |
|-------------------|-------|----------|--------|------------|
| Cpd 1: C22H29NO4S | 0.182 | 404.1896 | 192637 | C22H29NO4S |

| Compound Label    | m/z      | RT    | Algorithm       | Mass     |
|-------------------|----------|-------|-----------------|----------|
| Cpd 1: C22H29NO4S | 404.1858 | 0.182 | Find By Formula | 404.1896 |

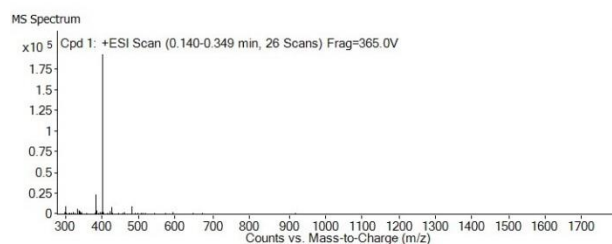

|                               |                                                      |                      |                     |
|-------------------------------|------------------------------------------------------|----------------------|---------------------|
| <b>Data File</b>              | 20180501A                                            | <b>Sample Name</b>   | AR-3                |
| <b>Sample Type</b>            | Sample                                               | <b>Position</b>      |                     |
| <b>Instrument Name</b>        | Instrument 1                                         | <b>User Name</b>     |                     |
| <b>Acq Method</b>             | HC ESI Pos Small Molecule LT No HPLC.m               | <b>Acquired Time</b> | 5/1/2018 9:39:49 AM |
| <b>IRM Calibration Status</b> | Success                                              | <b>DA Method</b>     | HCempirical1.m      |
| <b>Comment</b>                | EM=332.4880 M=HC ESI Pos Small Molecule LT No HPLC.m |                      |                     |

**Sample Group** Info.

**Molecular Formula** C20H32N2O2

#### Compound Table

| Compound Label    | RT   | Mass     | Abund | Formula    |
|-------------------|------|----------|-------|------------|
| Cpd 1: C20H32N2O2 | 0.23 | 333.2542 | 21580 | C20H32N2O2 |

| Compound Label    | m/z      | RT   | Algorithm       | Mass     |
|-------------------|----------|------|-----------------|----------|
| Cpd 1: C20H32N2O2 | 333.2575 | 0.23 | Find By Formula | 333.2542 |

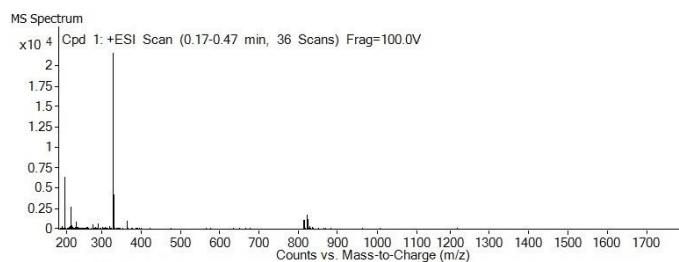

|                               |                                |                      |                      |
|-------------------------------|--------------------------------|----------------------|----------------------|
| <b>Data File</b>              | 20180501C                      | <b>Sample Name</b>   | AR-5                 |
| <b>Sample Type</b>            | Sample                         | <b>Position</b>      |                      |
| <b>Instrument Name</b>        | Instrument 1                   | <b>User Name</b>     |                      |
| <b>Acq Method</b>             | No HPLC MeOH 1.m               | <b>Acquired Time</b> | 5/1/2018 10:22:01 AM |
| <b>IRM Calibration Status</b> | Success                        | <b>DA Method</b>     | Data 1.m             |
| <b>Comment</b>                | EM=332.4880 M=No HPLC MeOH 1.m |                      |                      |

**Sample Group** Info.

**Molecular Formula** C20H32N2O2

**Acquisition SW Version** 6200 series TOF/6500 series Q-TOF B.05.01 (B5125)

#### Compound Table

| Compound Label    | RT    | Mass     | Abund  | Formula    |
|-------------------|-------|----------|--------|------------|
| Cpd 1: C20H32N2O2 | 0.186 | 333.2542 | 138368 | C20H32N2O2 |

| Compound Label    | m/z      | RT    | Algorithm       | Mass     |
|-------------------|----------|-------|-----------------|----------|
| Cpd 1: C20H32N2O2 | 333.2517 | 0.186 | Find By Formula | 333.2542 |

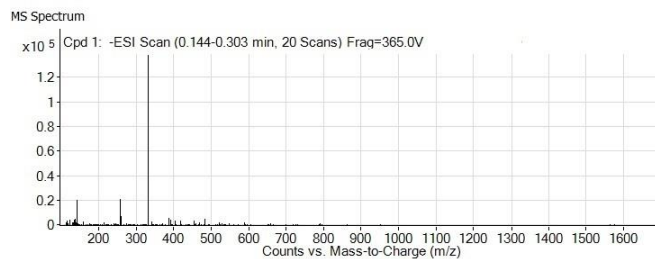

|                               |                                |                      |                     |
|-------------------------------|--------------------------------|----------------------|---------------------|
| <b>Data File</b>              | 20180501B                      | <b>Sample Name</b>   | AR-4                |
| <b>Sample Type</b>            | Sample                         | <b>Position</b>      |                     |
| <b>Instrument Name</b>        | Instrument 1                   | <b>User Name</b>     |                     |
| <b>Acq Method</b>             | No HPLC MeOH 1.m               | <b>Acquired Time</b> | 5/1/2018 9:52:55 AM |
| <b>IRM Calibration Status</b> | Success                        | <b>DA Method</b>     | Data 1.m            |
| <b>Comment</b>                | EM=475.5160 M=No HPLC MeOH 1.m |                      |                     |

|                          |           |                               |                                                      |
|--------------------------|-----------|-------------------------------|------------------------------------------------------|
| <b>Sample Group</b>      |           | <b>Info.</b>                  |                                                      |
| <b>Molecular Formula</b> | C24H29N3O | <b>Acquisition SW Version</b> | 6200 series TOF/6500 series<br>Q-TOF B.05.01 (B5125) |

#### Compound Table

| Compound Label   | RT    | Mass     | Abund  | Formula   |
|------------------|-------|----------|--------|-----------|
| Cpd 1: C24H29N3O | 0.179 | 376.2389 | 614304 | C24H29N3O |

| Compound Label   | m/z      | RT    | Algorithm       | Mass     |
|------------------|----------|-------|-----------------|----------|
| Cpd 1: C24H29N3O | 376.2391 | 0.179 | Find By Formula | 376.2389 |

#### MS Spectrum

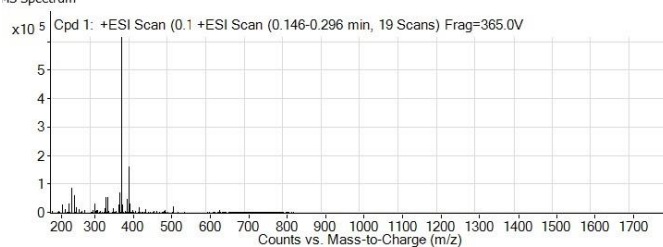

|                               |                                |                      |                     |
|-------------------------------|--------------------------------|----------------------|---------------------|
| <b>Data File</b>              | 20180509A                      | <b>Sample Name</b>   | A-94                |
| <b>Sample Type</b>            | Sample                         | <b>Position</b>      |                     |
| <b>Instrument Name</b>        | Instrument 1                   | <b>User Name</b>     |                     |
| <b>Acq Method</b>             | No HPLC MeOH 1.m               | <b>Acquired Time</b> | 5/9/2018 9:17:02 AM |
| <b>IRM Calibration Status</b> | Success                        | <b>DA Method</b>     | Data 1.m            |
| <b>Comment</b>                | EM=361.5300 M=No HPLC MeOH 1.m |                      |                     |

|                          |            |                               |                                                        |
|--------------------------|------------|-------------------------------|--------------------------------------------------------|
| <b>Sample Group</b>      |            | <b>Info.</b>                  |                                                        |
| <b>Molecular Formula</b> | C21H35N3O2 | <b>Acquisition SW Version</b> | 6200 series TOF/6500 series<br>Q-TOF B.05.01 (B5125.1) |

#### Compound Table

| Compound Label    | RT    | Mass     | Abund  | Formula    |
|-------------------|-------|----------|--------|------------|
| Cpd 1: C21H35N3O2 | 0.185 | 362.2808 | 276800 | C21H35N3O2 |

| Compound Label    | m/z      | RT    | Algorithm       | Mass     |
|-------------------|----------|-------|-----------------|----------|
| Cpd 1: C21H35N3O2 | 362.2833 | 0.185 | Find By Formula | 362.2808 |

#### MS Spectrum

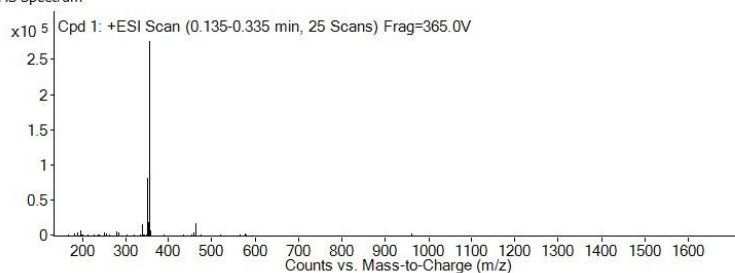

|                               |                                |                      |                     |
|-------------------------------|--------------------------------|----------------------|---------------------|
| <b>Data File</b>              | 20180509B                      | <b>Sample Name</b>   | A-95                |
| <b>Sample Type</b>            | Sample                         | <b>Position</b>      |                     |
| <b>Instrument Name</b>        | Instrument 1                   | <b>User Name</b>     |                     |
| <b>Acq Method</b>             | No HPLC MeOH 1.m               | <b>Acquired Time</b> | 5/9/2019 9:44:12 AM |
| <b>IRM Calibration Status</b> | Success                        | <b>DA Method</b>     | Data 1.m            |
| <b>Comment</b>                | EM=346.5150 M=No HPLC MeOH 1.m |                      |                     |

|                          |            |                               |                                                        |
|--------------------------|------------|-------------------------------|--------------------------------------------------------|
| <b>Sample Group</b>      |            | <b>Info.</b>                  |                                                        |
| <b>Molecular Formula</b> | C21H34N2O2 | <b>Acquisition SW Version</b> | 6200 series TOF/6500 series<br>Q-TOF B.05.01 (B5125.1) |

#### Compound Table

| Compound Label    | RT    | Mass     | Abund  | Formula    |
|-------------------|-------|----------|--------|------------|
| Cpd 1: C21H34N2O2 | 0.181 | 347.2699 | 297920 | C21H34N2O2 |

| Compound Label    | m/z      | RT    | Algorithm       | Mass     |
|-------------------|----------|-------|-----------------|----------|
| Cpd 1: C21H34N2O2 | 347.2629 | 0.181 | Find By Formula | 347.2699 |

#### MS Spectrum

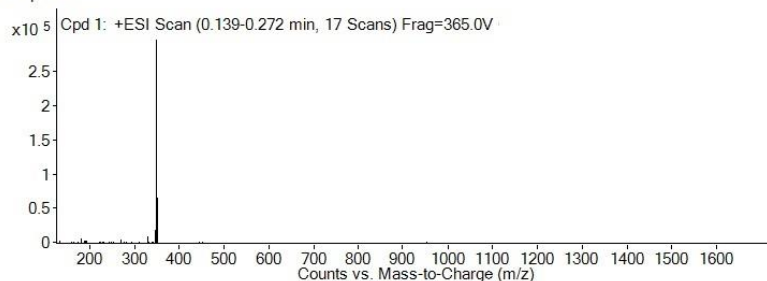

|                               |                                |                      |                      |
|-------------------------------|--------------------------------|----------------------|----------------------|
| <b>Data File</b>              | 20180509C                      | <b>Sample Name</b>   | A-102                |
| <b>Sample Type</b>            | Sample                         | <b>Position</b>      |                      |
| <b>Instrument Name</b>        | Instrument 1                   | <b>User Name</b>     |                      |
| <b>Acq Method</b>             | No HPLC MeOH 1.m               | <b>Acquired Time</b> | 5/9/2018 10:11:49 AM |
| <b>IRM Calibration Status</b> | Success                        | <b>DA Method</b>     | Data 1.m             |
| <b>Comment</b>                | EM=367.5565 M=No HPLC MeOH 1.m |                      |                      |

|                          |           |                               |                                                        |
|--------------------------|-----------|-------------------------------|--------------------------------------------------------|
| <b>Sample Group</b>      |           | <b>Info.</b>                  |                                                        |
| <b>Molecular Formula</b> | C24H35N2O | <b>Acquisition SW Version</b> | 6200 series TOF/6500 series<br>Q-TOF B.05.01 (B5125.1) |

#### Compound Table

| Compound Label   | RT    | Mass     | Abund  | Formula   |
|------------------|-------|----------|--------|-----------|
| Cpd 1: C24H35N2O | 0.181 | 368.2822 | 391837 | C24H35N2O |

| Compound Label   | m/z      | RT    | Algorithm       | Mass     |
|------------------|----------|-------|-----------------|----------|
| Cpd 1: C24H35N2O | 368.2809 | 0.181 | Find By Formula | 368.2822 |

#### MS Spectrum

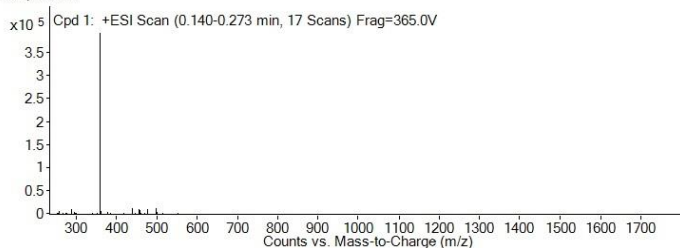

|                               |                                |                      |                      |
|-------------------------------|--------------------------------|----------------------|----------------------|
| <b>Data File</b>              | 20180509D                      | <b>Sample Name</b>   | A-103                |
| <b>Sample Type</b>            | Sample                         | <b>Position</b>      |                      |
| <b>Instrument Name</b>        | Instrument 1                   | <b>User Name</b>     |                      |
| <b>Acq Method</b>             | No HPLC MeOH 1.m               | <b>Acquired Time</b> | 5/9/2018 10:38:25 AM |
| <b>IRM Calibration Status</b> | Success                        | <b>DA Method</b>     | Data 1.m             |
| <b>Comment</b>                | EM=368.5210 M=No HPLC MeOH 1.m |                      |                      |

|                          |            |                               |                                                        |
|--------------------------|------------|-------------------------------|--------------------------------------------------------|
| <b>Sample Group</b>      |            | <b>Info.</b>                  |                                                        |
| <b>Molecular Formula</b> | C23H32N2O2 | <b>Acquisition SW Version</b> | 6200 series TOF/6500 series<br>Q-TOF B.05.01 (B5125.1) |

#### Compound Table

| Compound Label    | RT   | Mass     | Abund  | Formula    |
|-------------------|------|----------|--------|------------|
| Cpd 1: C23H32N2O2 | 0.18 | 369.2542 | 249707 | C23H32N2O2 |

| Compound Label    | m/z      | RT   | Algorithm       | Mass     |
|-------------------|----------|------|-----------------|----------|
| Cpd 1: C23H32N2O2 | 369.2538 | 0.18 | Find By Formula | 369.2542 |

#### MS Spectrum

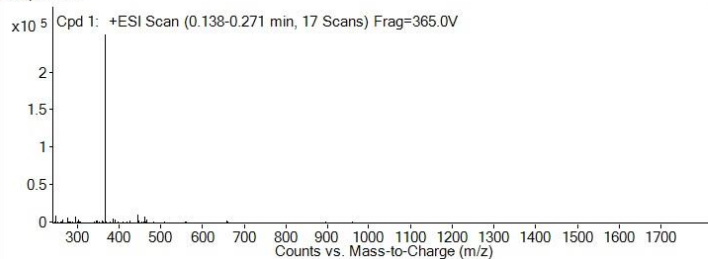

|                               |                                |                      |                      |
|-------------------------------|--------------------------------|----------------------|----------------------|
| <b>Data File</b>              | 20180509E                      | <b>Sample Name</b>   | A-104                |
| <b>Sample Type</b>            | Sample                         | <b>Position</b>      |                      |
| <b>Instrument Name</b>        | Instrument 1                   | <b>User Name</b>     |                      |
| <b>Acq Method</b>             | No HPLC MeOH 1.m               | <b>Acquired Time</b> | 5/9/2018 11:01:15 AM |
| <b>IRM Calibration Status</b> | Success                        | <b>DA Method</b>     | Data 1.m             |
| <b>Comment</b>                | EM=359.5775 M=No HPLC MeOH 1.m |                      |                      |

|                          |           |                               |                                                        |
|--------------------------|-----------|-------------------------------|--------------------------------------------------------|
| <b>Sample Group</b>      |           | <b>Info.</b>                  |                                                        |
| <b>Molecular Formula</b> | C23H39N2O | <b>Acquisition SW Version</b> | 6200 series TOF/6500 series<br>Q-TOF B.05.01 (B5125.1) |

#### Compound Table

| Compound Label   | RT    | Mass     | Abund  | Formula   |
|------------------|-------|----------|--------|-----------|
| Cpd 1: C23H39N2O | 0.181 | 360.3135 | 337012 | C23H39N2O |

| Compound Label   | m/z      | RT    | Algorithm       | Mass     |
|------------------|----------|-------|-----------------|----------|
| Cpd 1: C23H39N2O | 360.3123 | 0.181 | Find By Formula | 360.3135 |

#### MS Spectrum

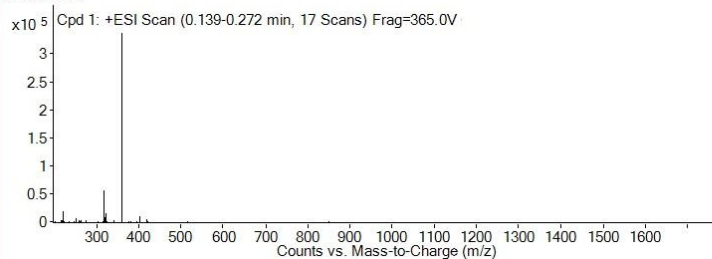

|                               |                                |                      |                      |
|-------------------------------|--------------------------------|----------------------|----------------------|
| <b>Data File</b>              | 20180509F                      | <b>Sample Name</b>   | A105                 |
| <b>Sample Type</b>            | Sample                         | <b>Position</b>      |                      |
| <b>Instrument Name</b>        | Instrument 1                   | <b>User Name</b>     |                      |
| <b>Acq Method</b>             | No HPLC MeOH 1.m               | <b>Acquired Time</b> | 5/9/2018 11:27:40 AM |
| <b>IRM Calibration Status</b> | Success                        | <b>DA Method</b>     | Data 1.m             |
| <b>Comment</b>                | EM=331.5235 M=No HPLC MeOH 1.m |                      |                      |

|                          |           |                       |                             |
|--------------------------|-----------|-----------------------|-----------------------------|
| <b>Sample Group</b>      |           | <b>Info.</b>          |                             |
| <b>Molecular Formula</b> | C21H35N2O | <b>Acquisition SW</b> | 6200 series TOF/6500 series |
|                          |           | <b>Version</b>        | Q-TOF B.05.01 (B5125.1)     |

#### Compound Table

| Compound Label   | RT    | Mass     | Abund  | Formula   |
|------------------|-------|----------|--------|-----------|
| Cpd 1: C21H35N2O | 0.176 | 332.2822 | 260882 | C21H35N2O |

| Compound Label   | m/z      | RT    | Algorithm       | Mass     |
|------------------|----------|-------|-----------------|----------|
| Cpd 1: C21H35N2O | 332.2871 | 0.171 | Find By Formula | 332.2822 |

#### MS Spectrum

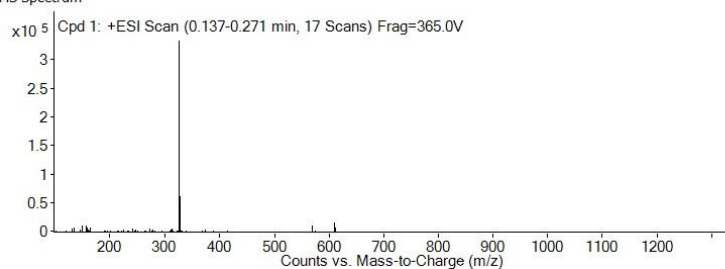

Supplement: Supplementary file 1 [file molecules-23-02750-s001.pdf]
